# Supplementary material for: 2,4,6-Trichloro-1,3,5-triazine (TCT) mediated one-pot sequential functionalisation of glycosides for the generation of orthogonally protected monosaccharide building blocks
Source: Royal Society of Chemistry journal article supplement (doi:10.1039/c2ob25452b), 2012-01-01

## Supporting information

### **2,4,6-Trichloro-1,3,5-triazine (TCT) mediated one-pot sequential functionalisation of glucosides for the generation of orthogonally protected monosaccharide building blocks**

Madhubabu Tatina <sup>a</sup>, Syed Khalid Yousuf, <sup>a</sup> Debaraj Mukherjee <sup>a\*</sup>

Org. Biomol. Chem., 2012, **10**, 5357- 5360 (DOI: 10.1039/C2OB25452B), Communication

<sup>1</sup>H NMR of compound 1a

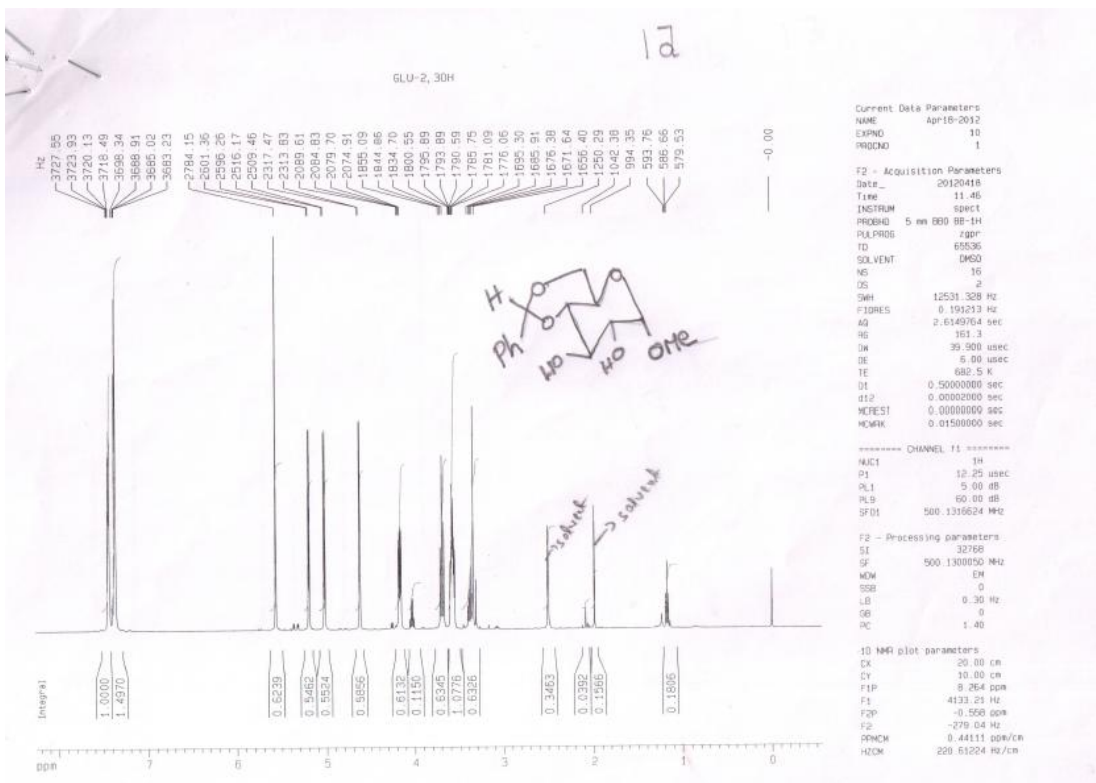

<sup>13</sup>C NMR of compound 1a

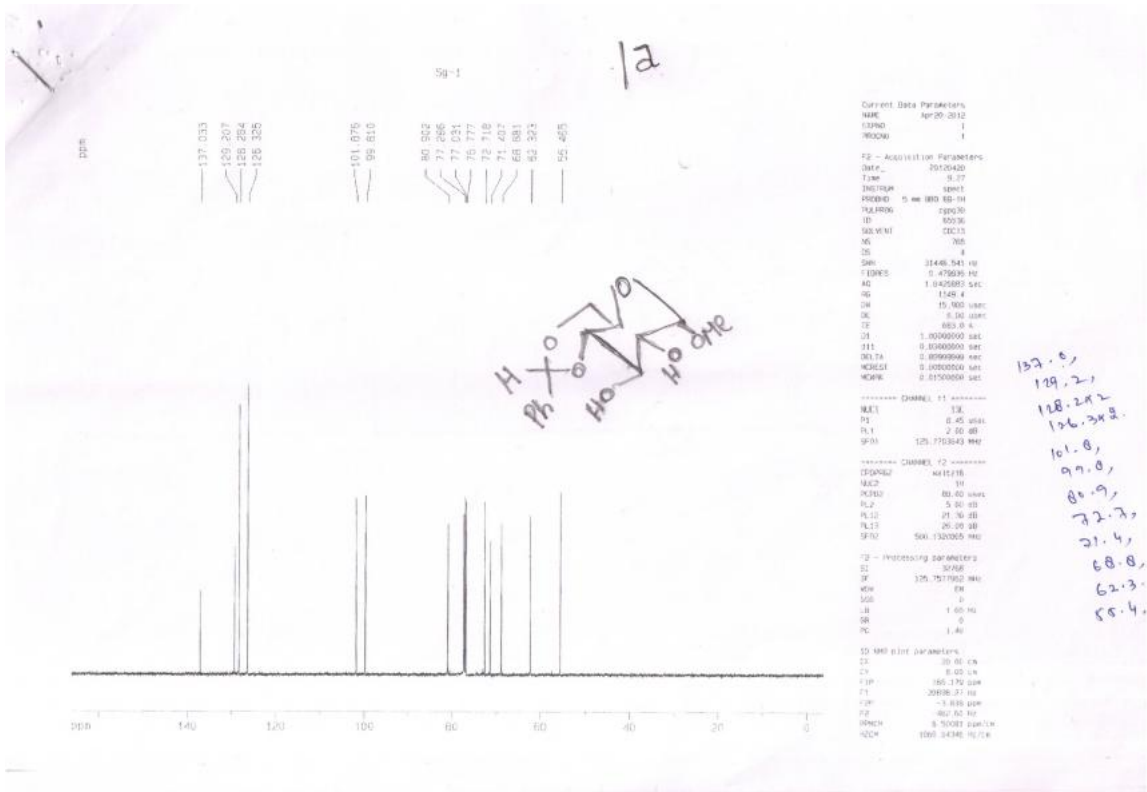

<sup>1</sup>H NMR of compound 1b

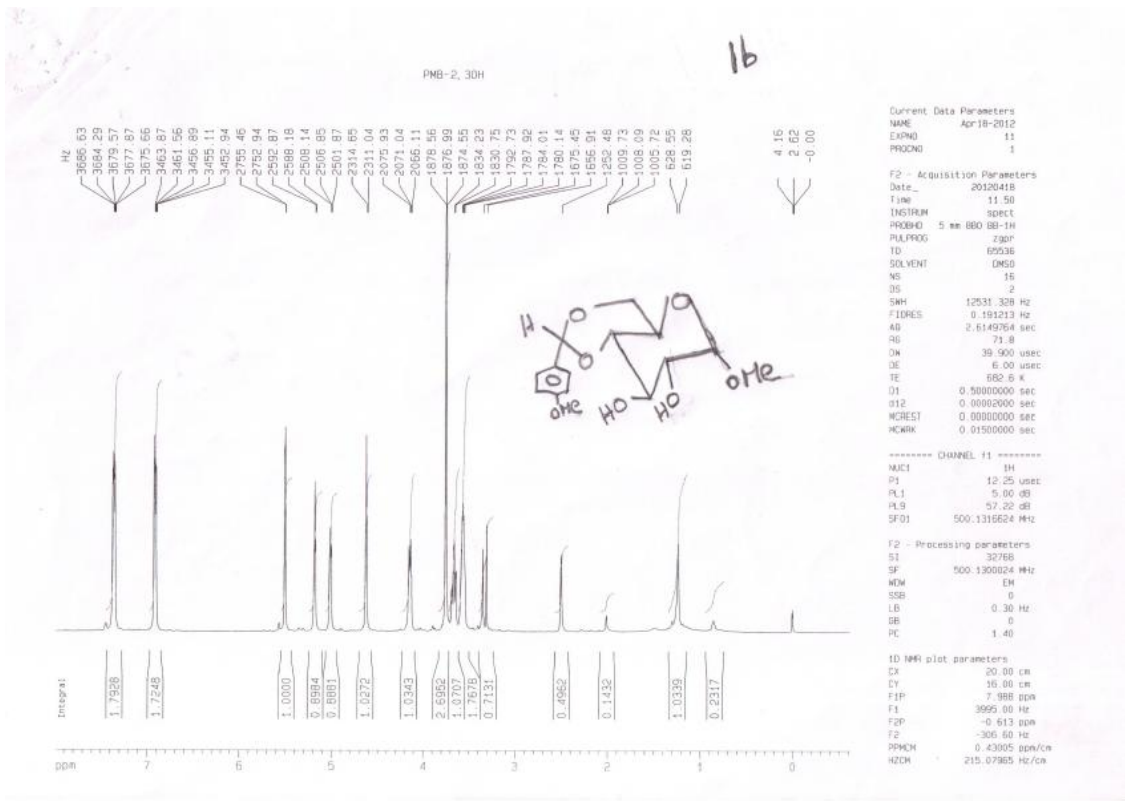

<sup>13</sup>C NMR of compound 1b

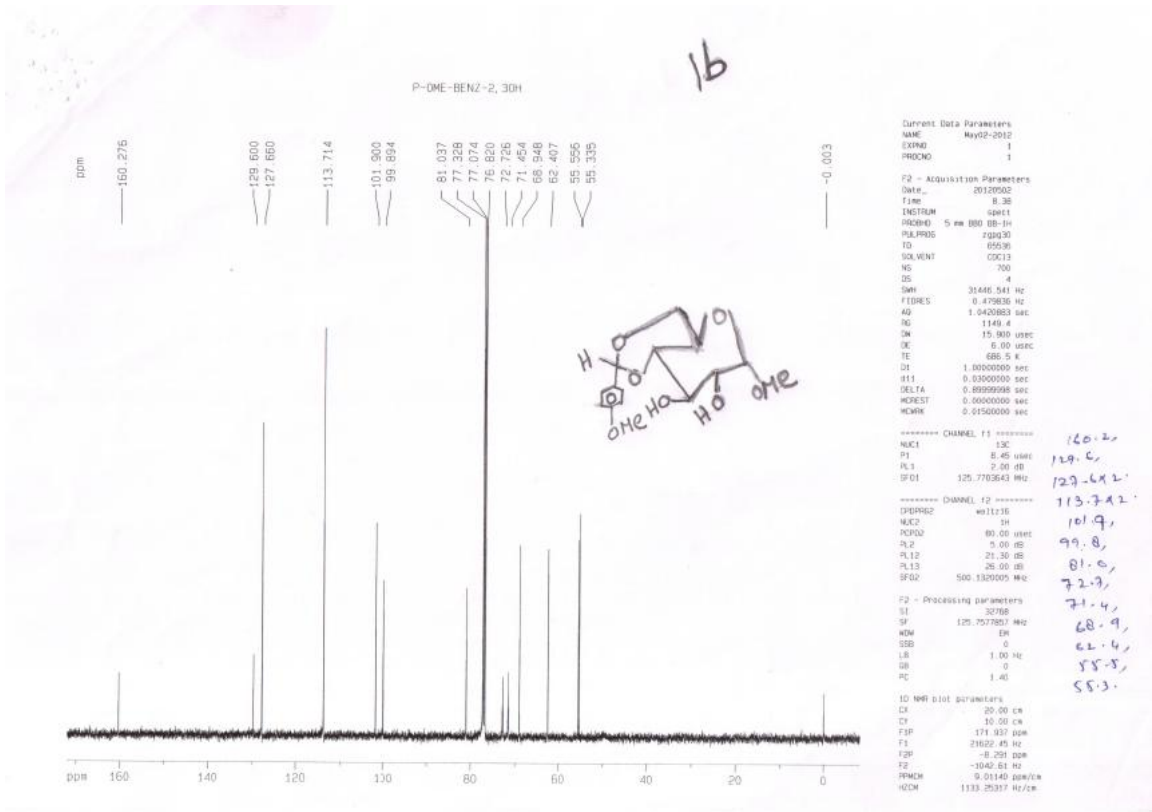



<sup>1</sup>H NMR of compound 3a

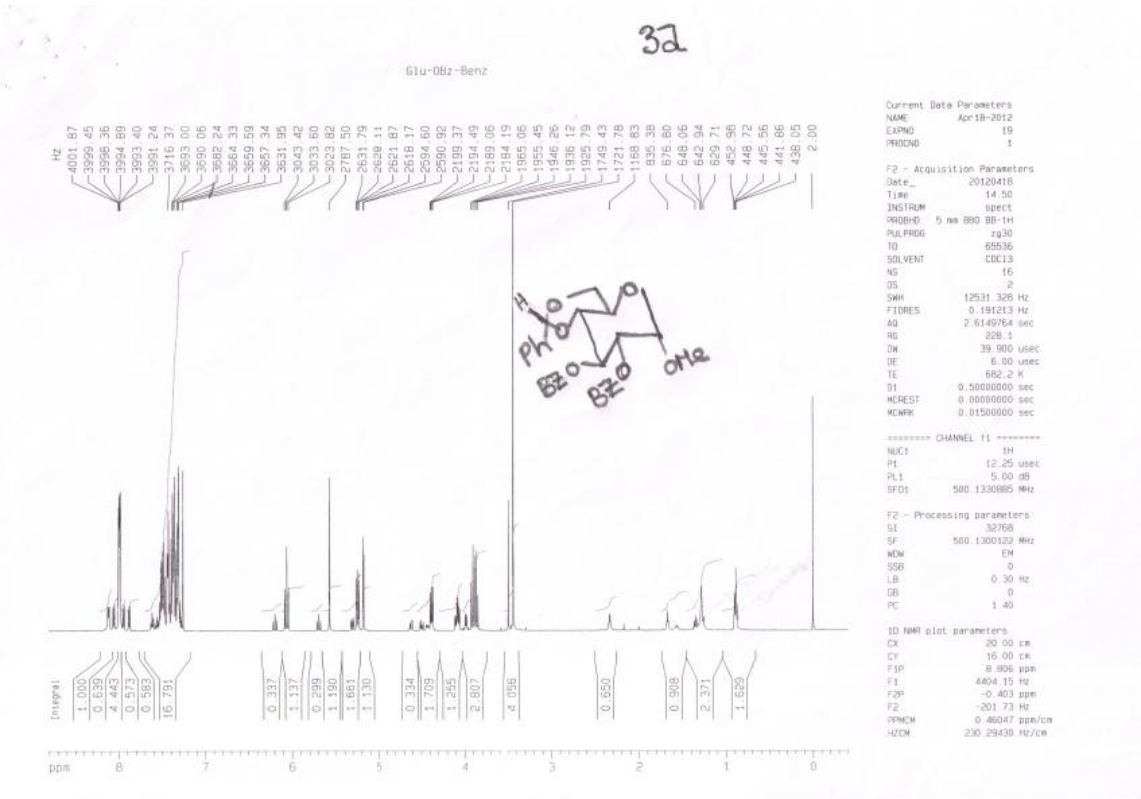

<sup>13</sup>C NMR of compound 3a

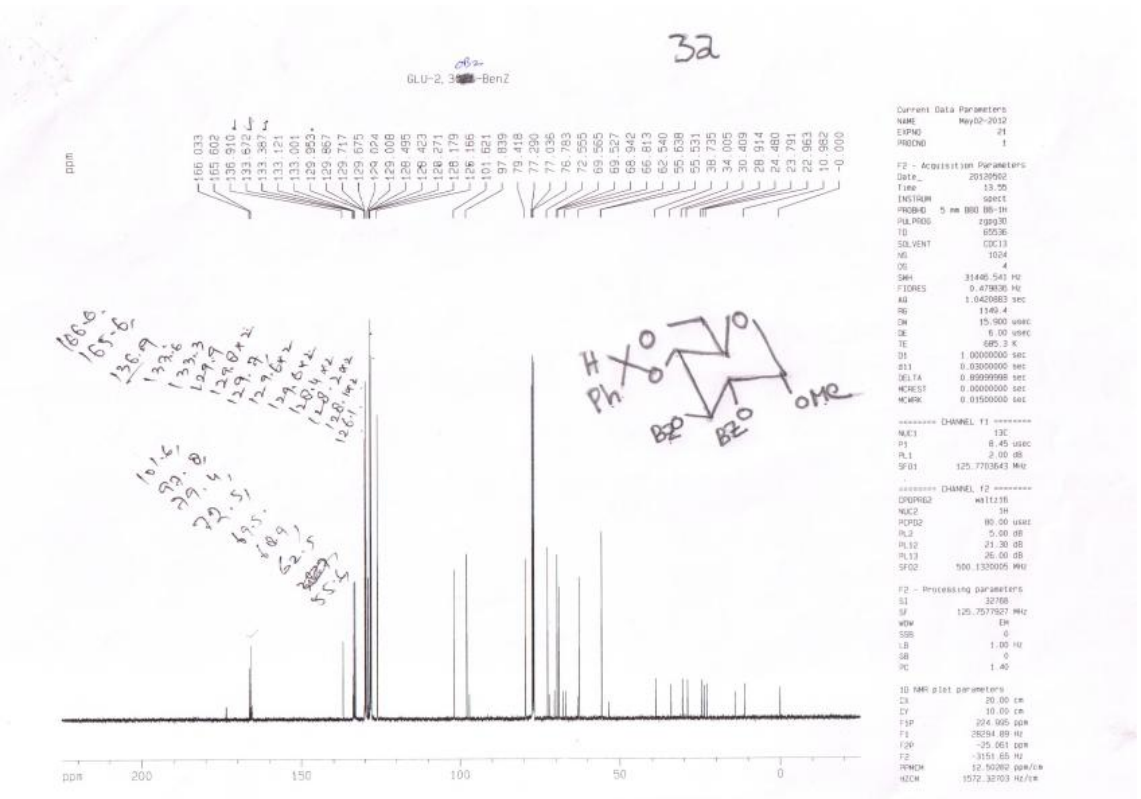

# <sup>1</sup>H NMR of compound 4a

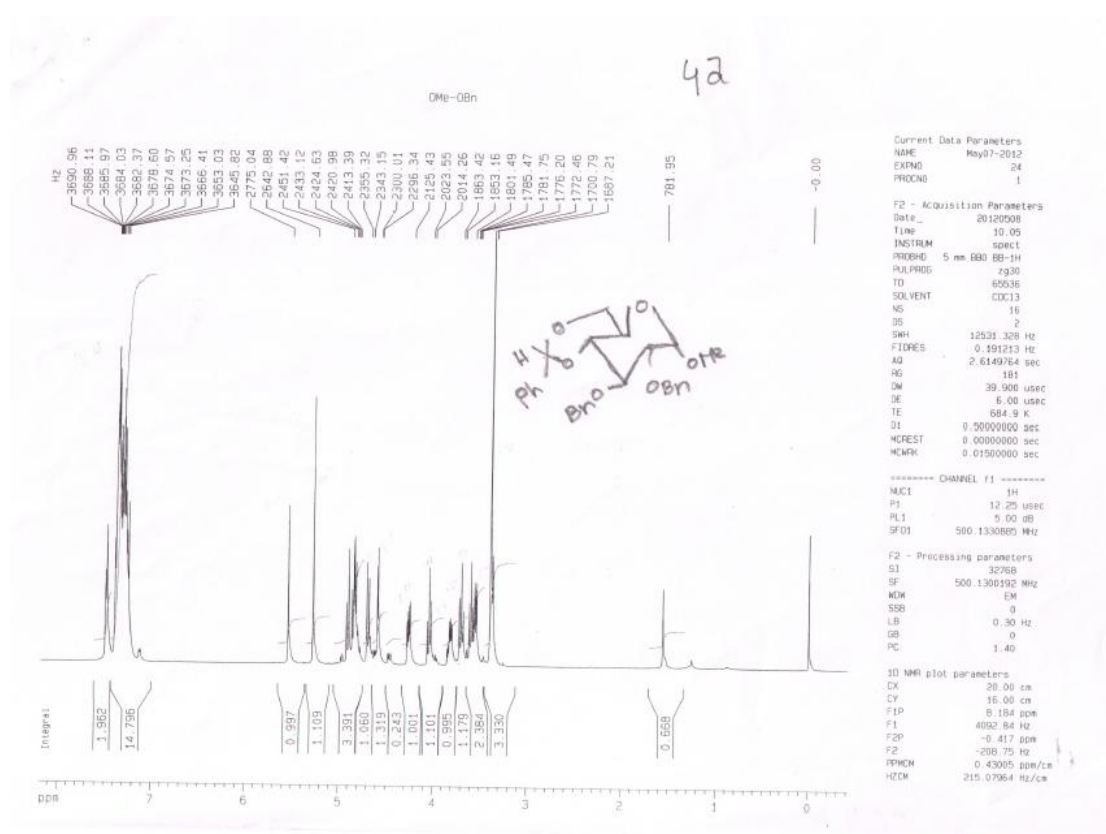

# <sup>13</sup>C NMR of compound 4a

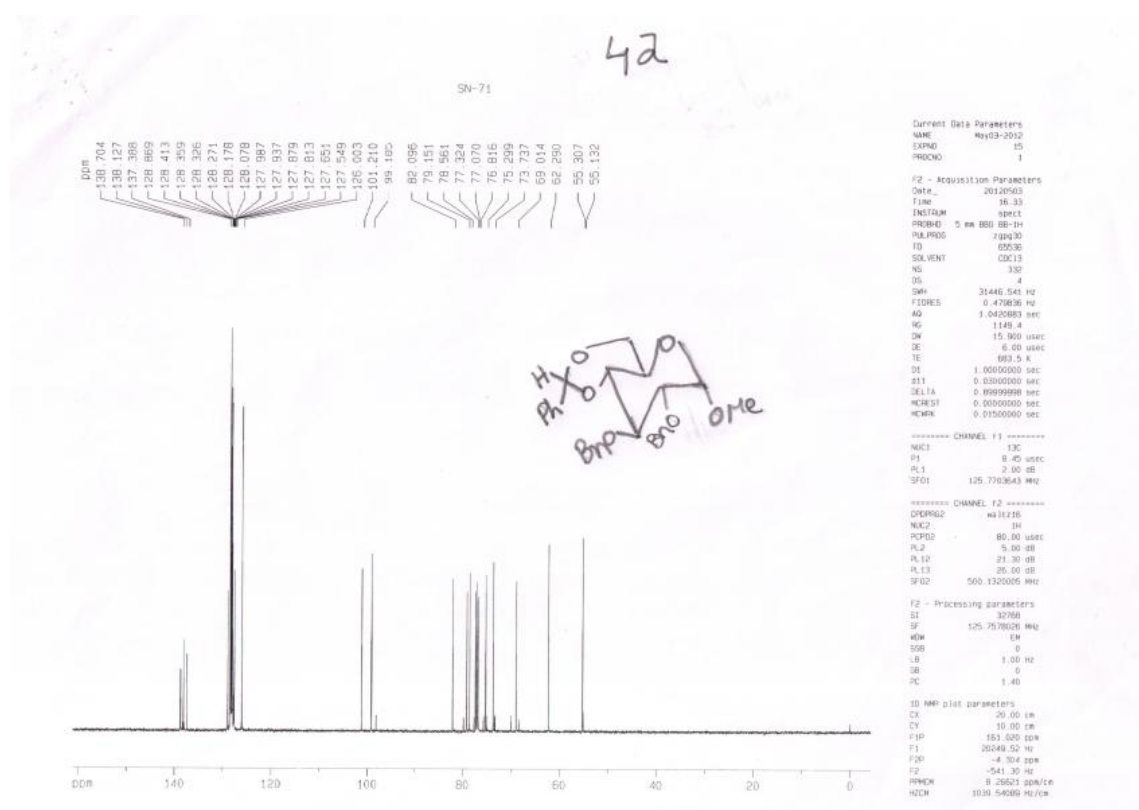



# <sup>1</sup>H NMR of compound 5a

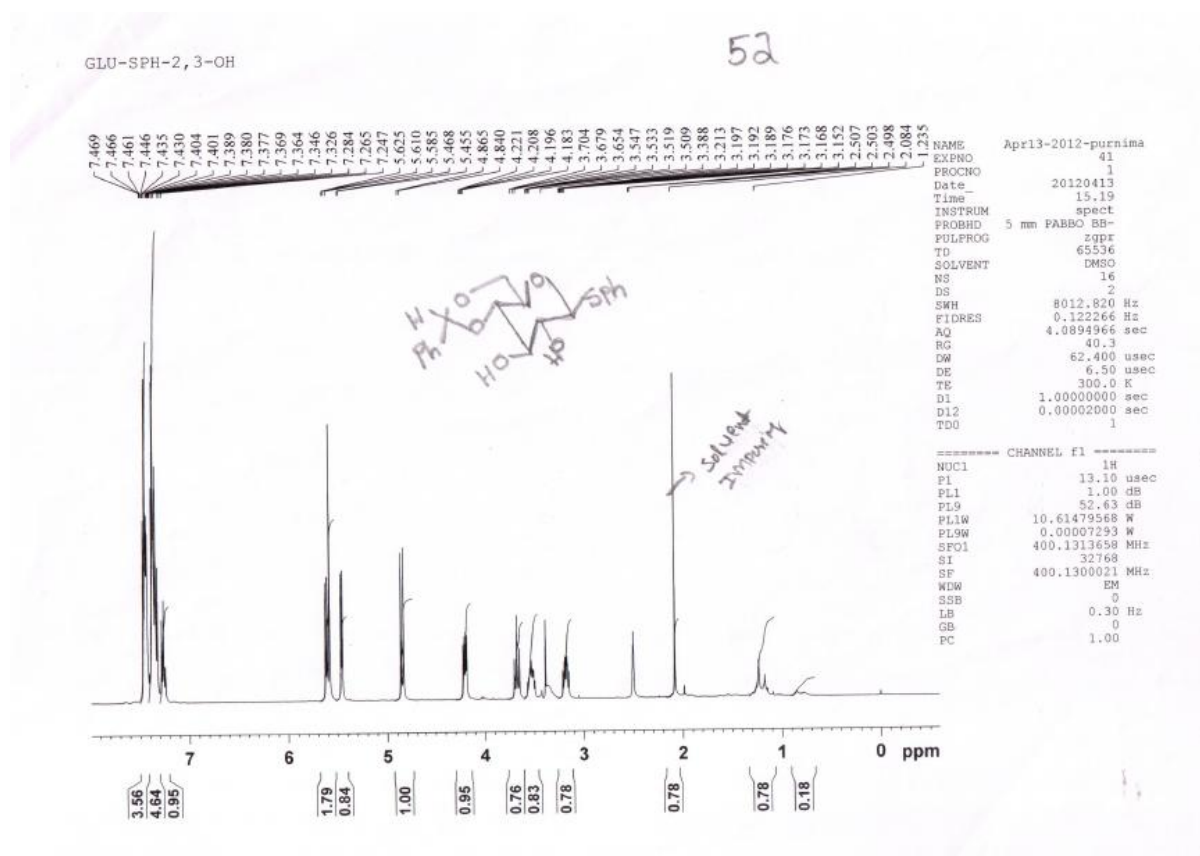

# <sup>13</sup>C NMR of compound 5a

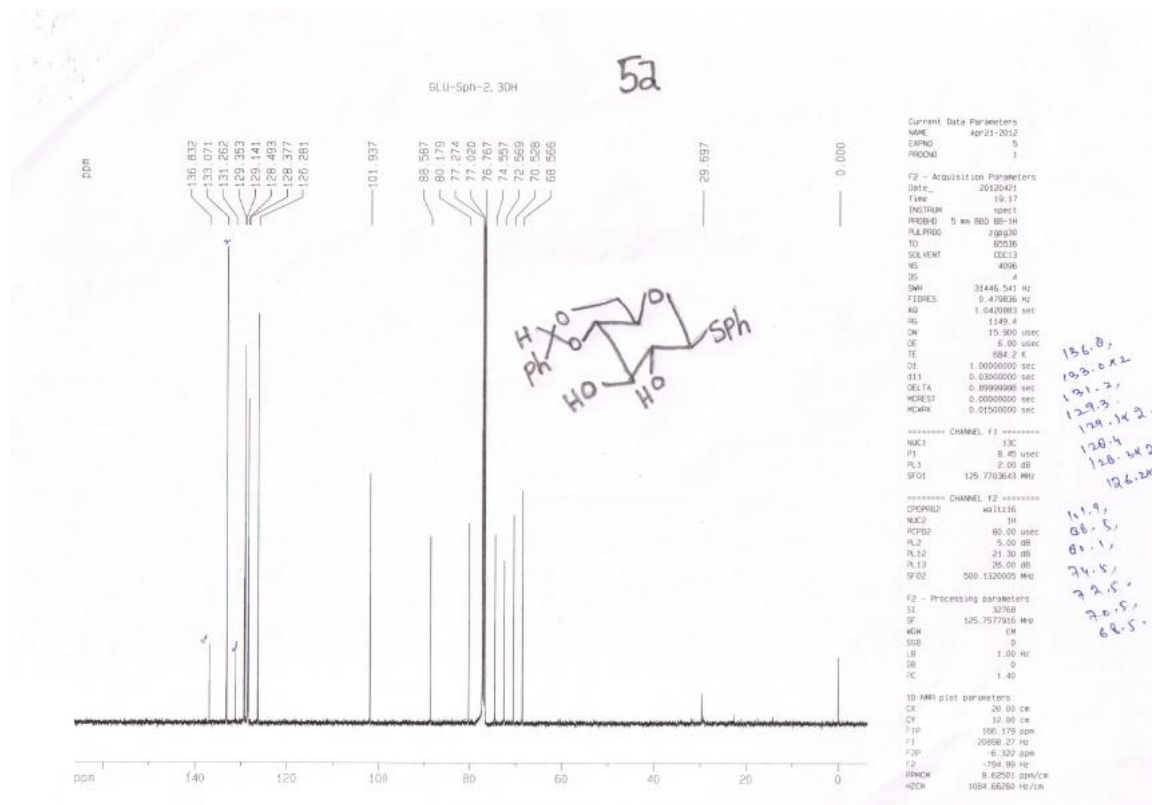

# <sup>1</sup>H NMR of compound 6a

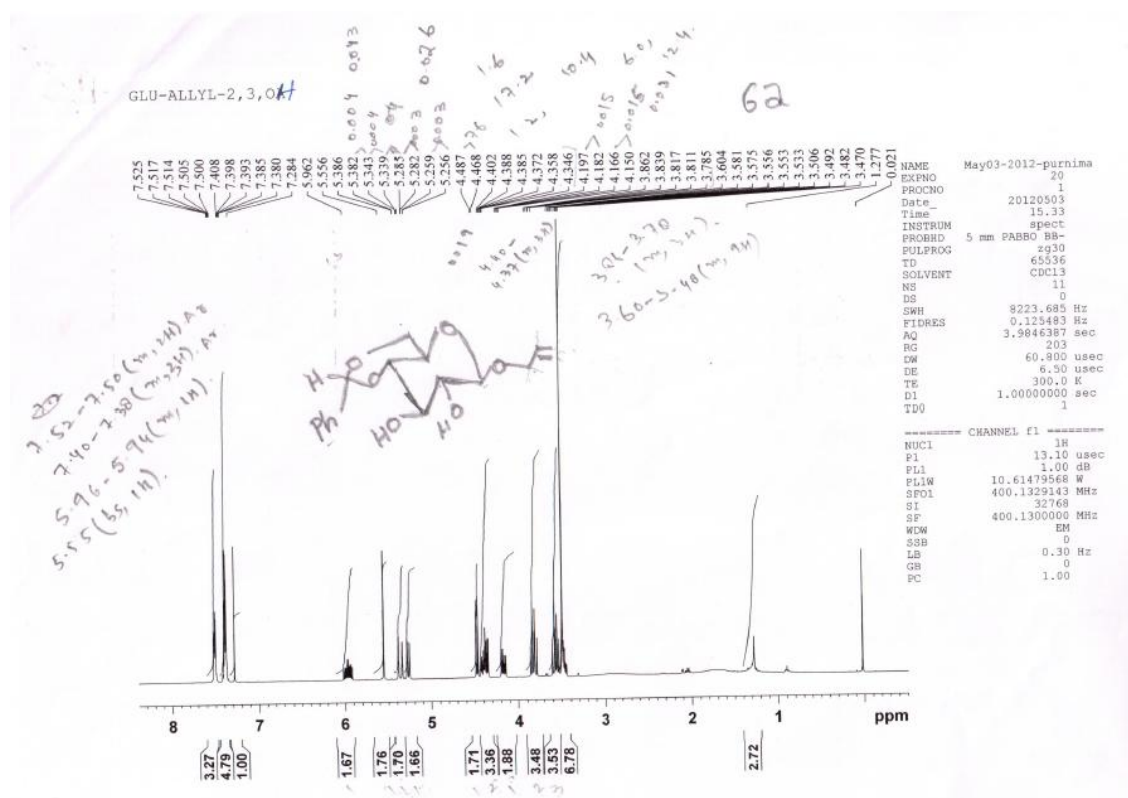

# <sup>13</sup>C NMR of compound 6a

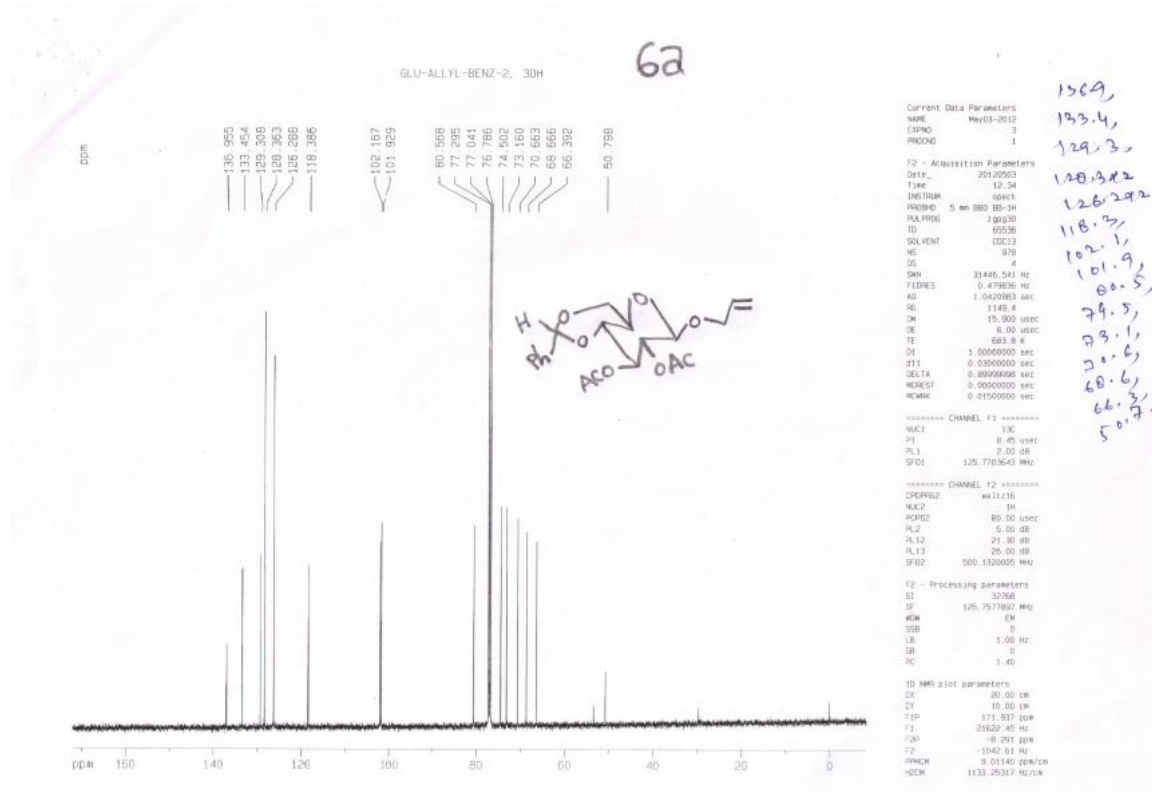



# <sup>1</sup>H NMR of compound 9a

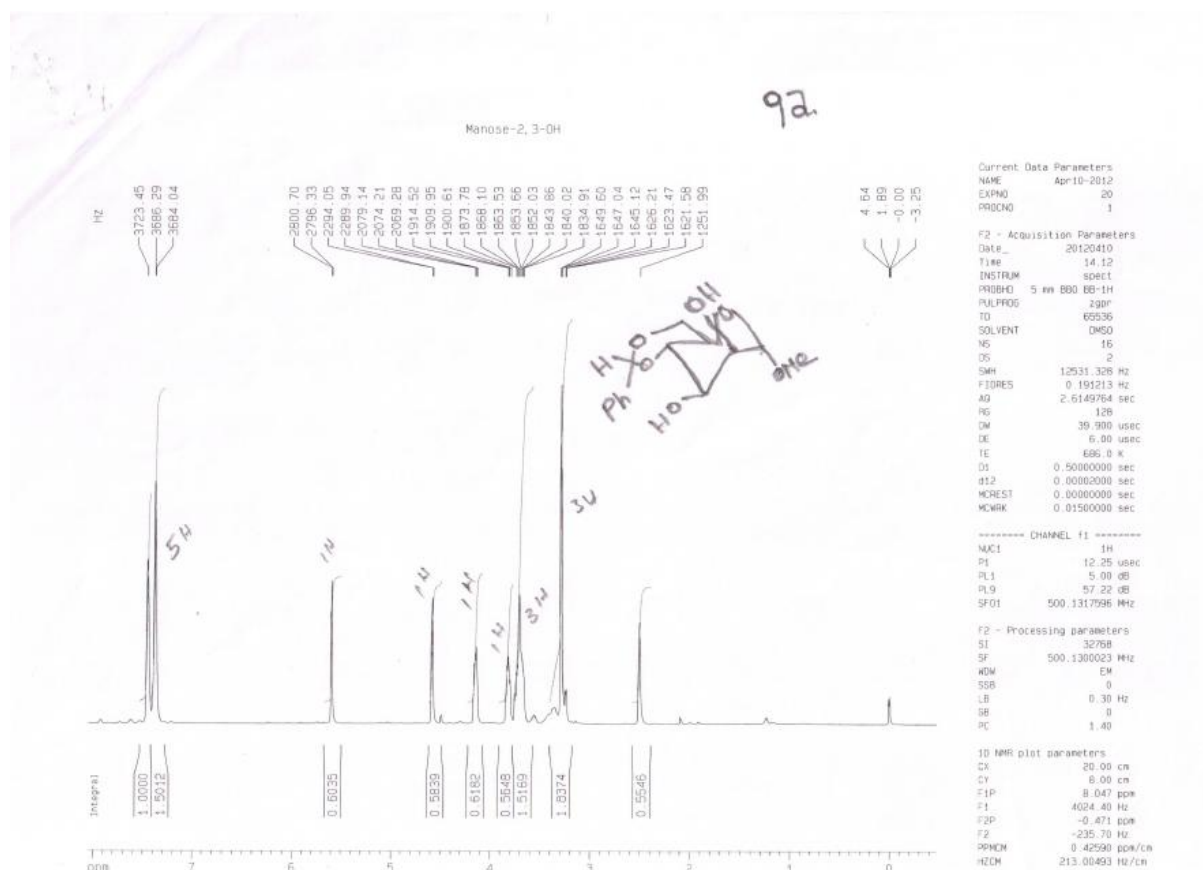

# <sup>13</sup>C NMR of compound 9a

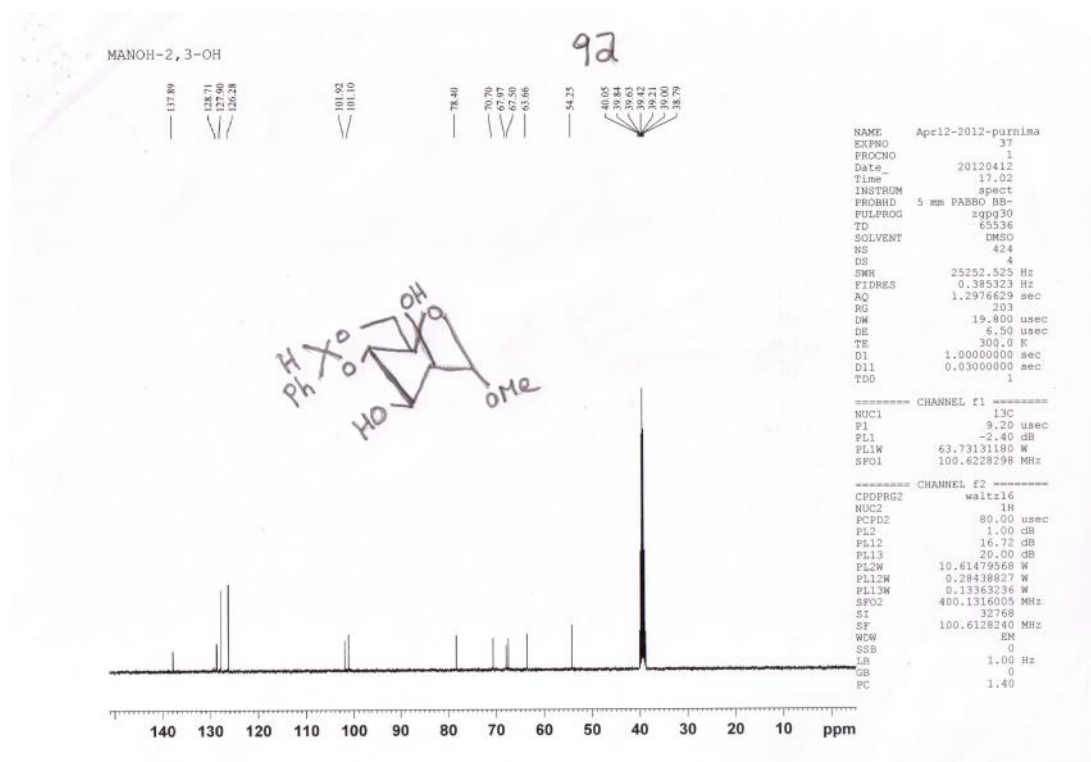

# <sup>1</sup>H NMR of compound 10a

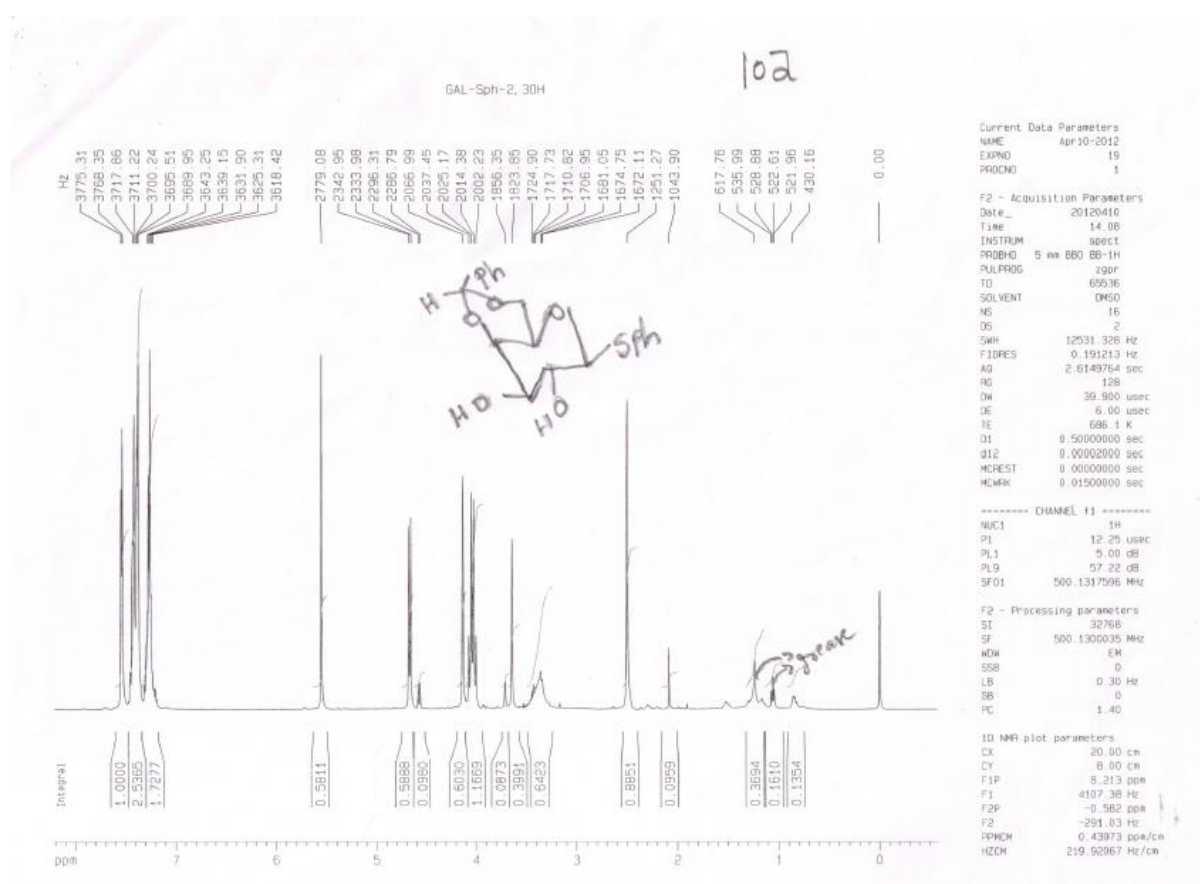

# <sup>13</sup>C NMR of compound 10a

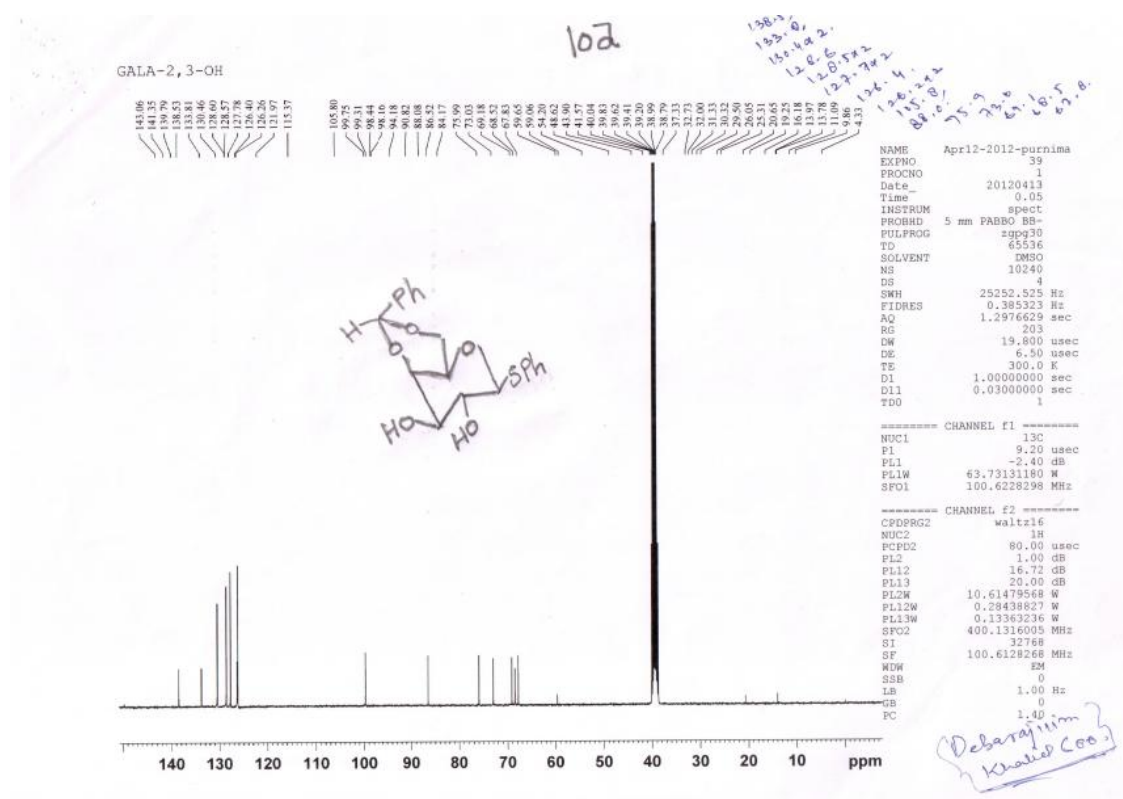



<sup>1</sup>H NMR of compound 12b

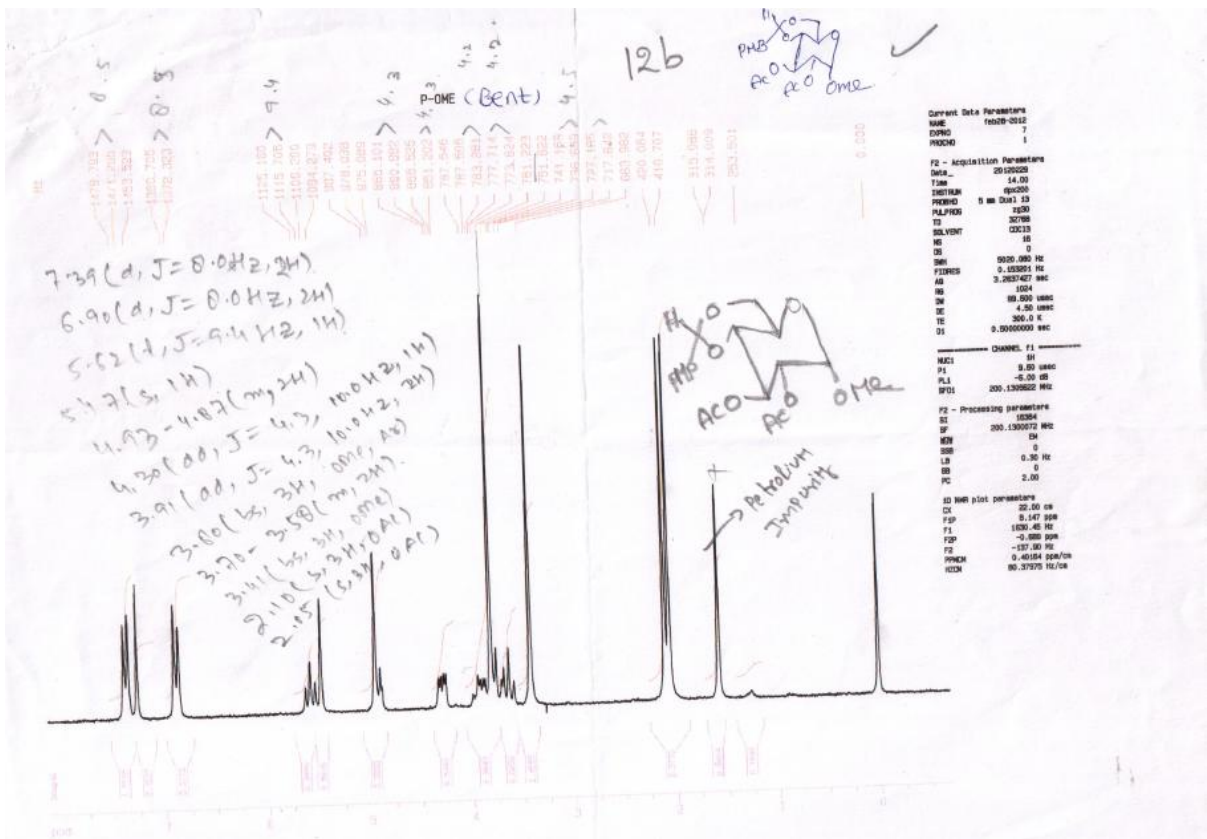

<sup>13</sup>C NMR of compound 12b

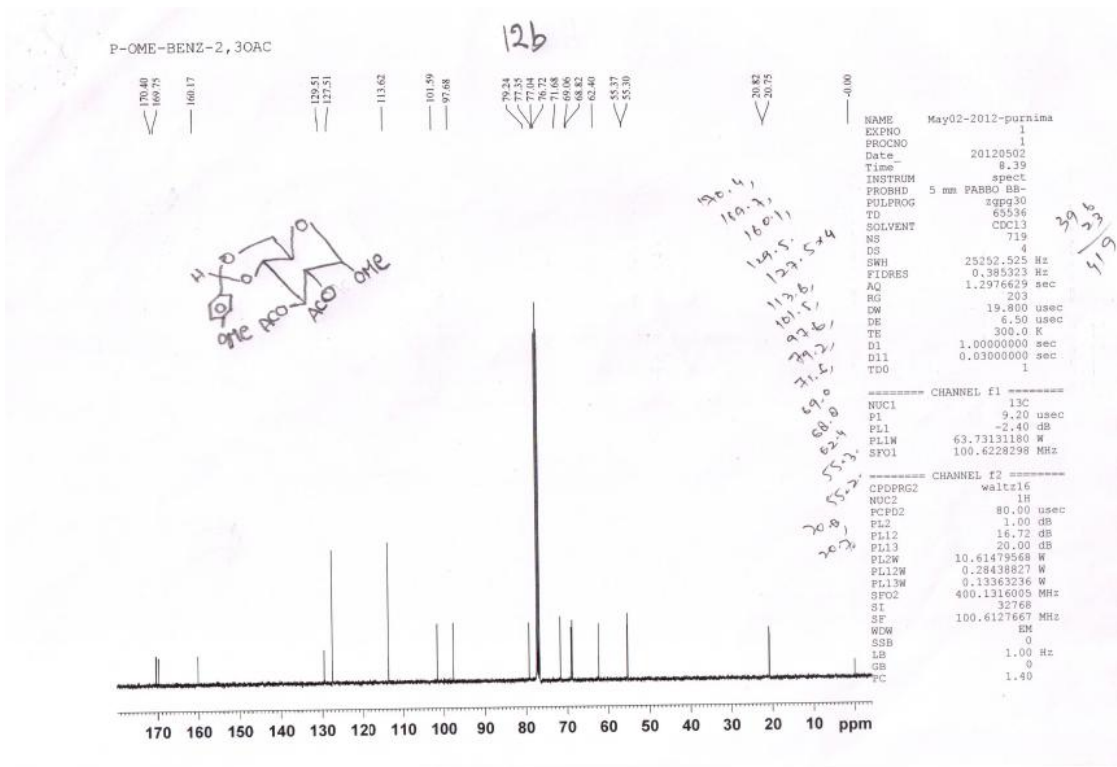



# <sup>1</sup>H NMR of compound 13a

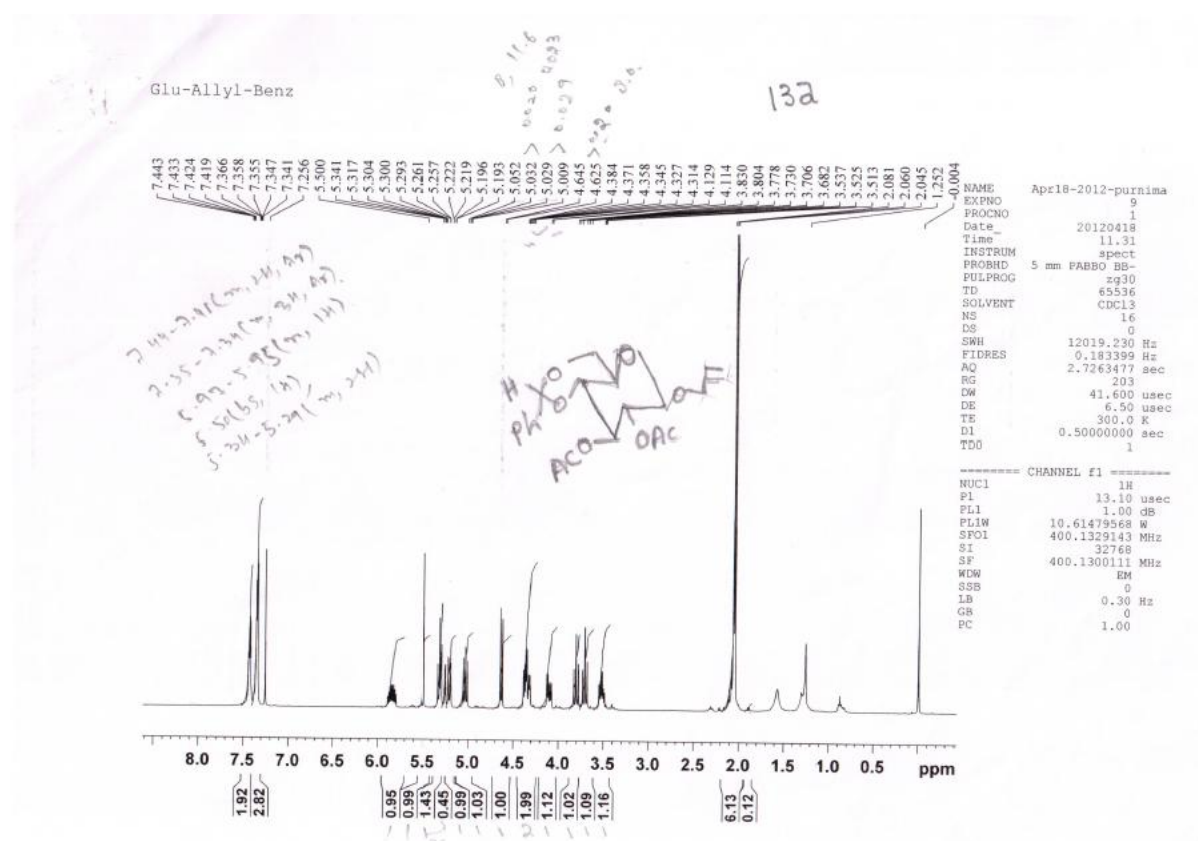

# <sup>13</sup>C NMR of compound 13a

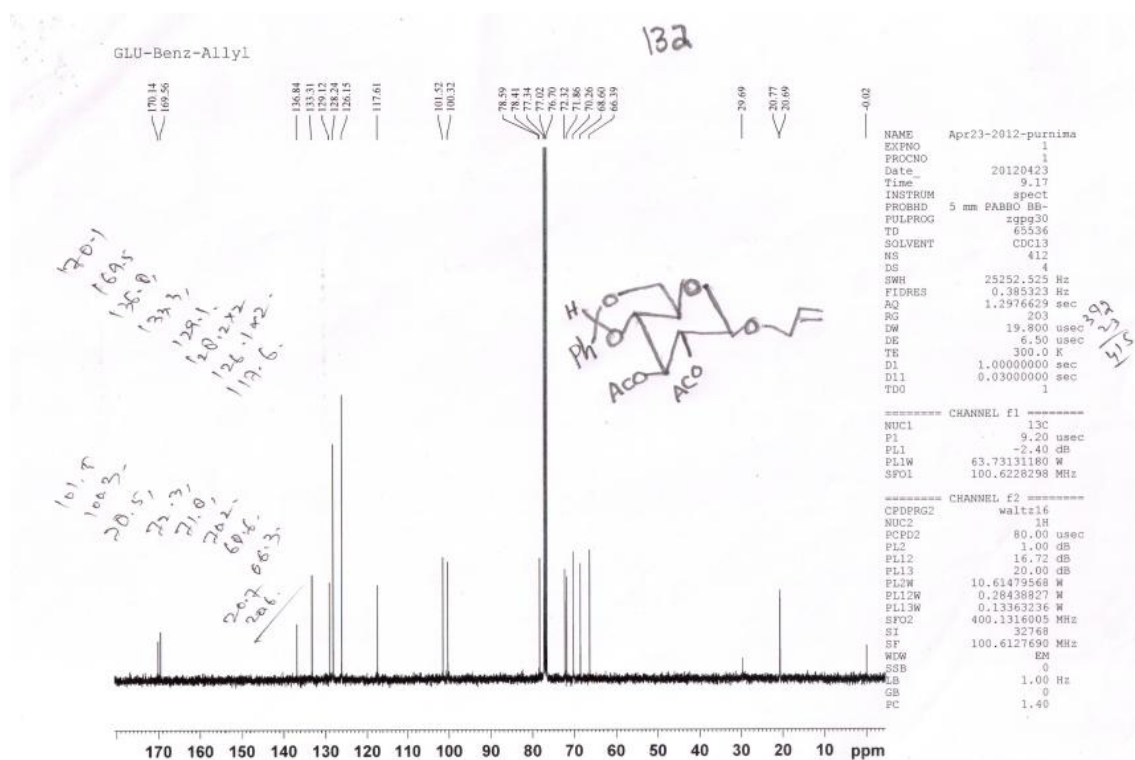





# <sup>1</sup>H NMR of compound 17a

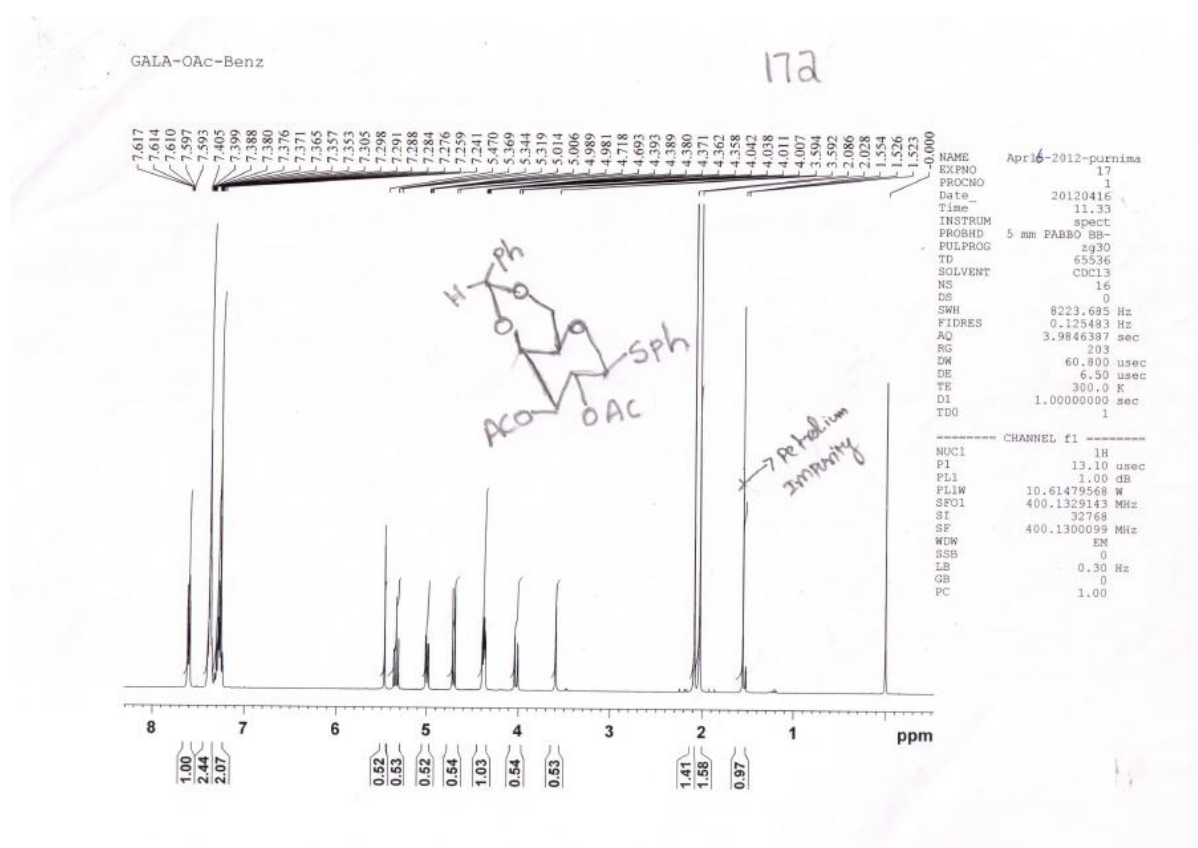

# <sup>13</sup>C NMR of compound 17a

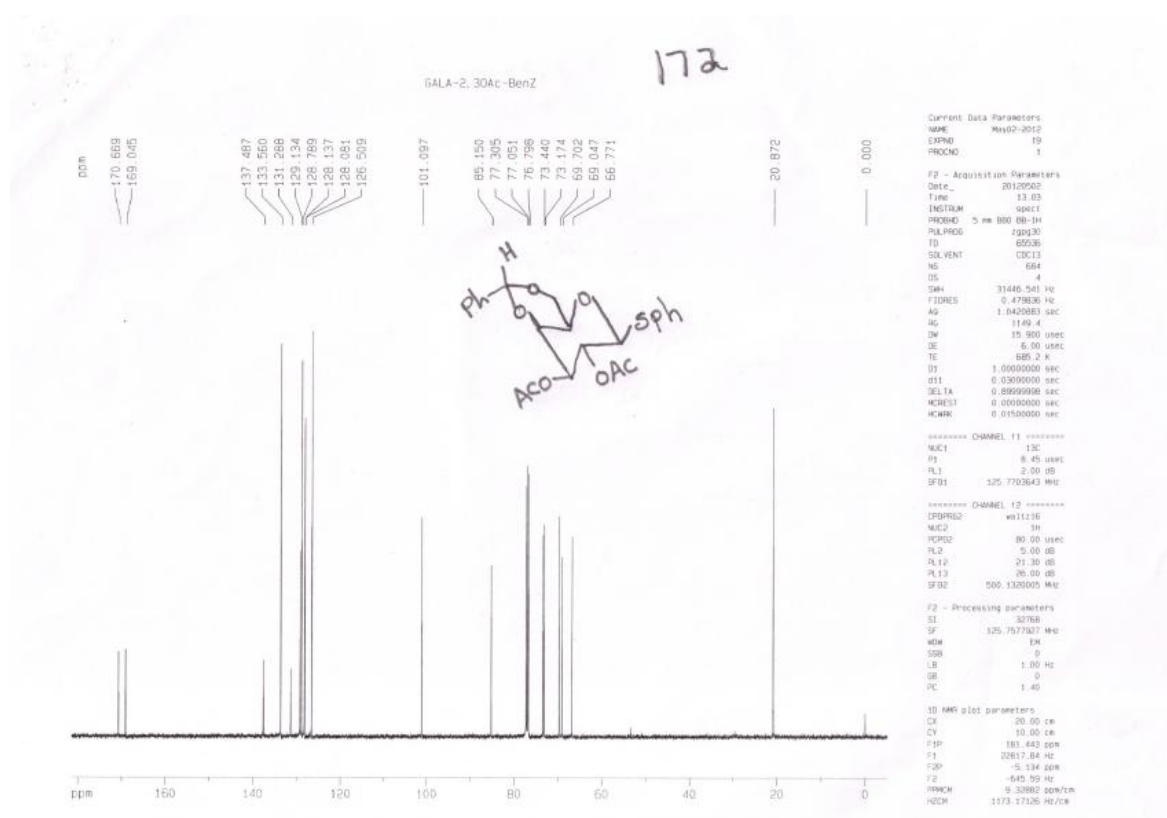







# <sup>1</sup>H NMR of compound 21a

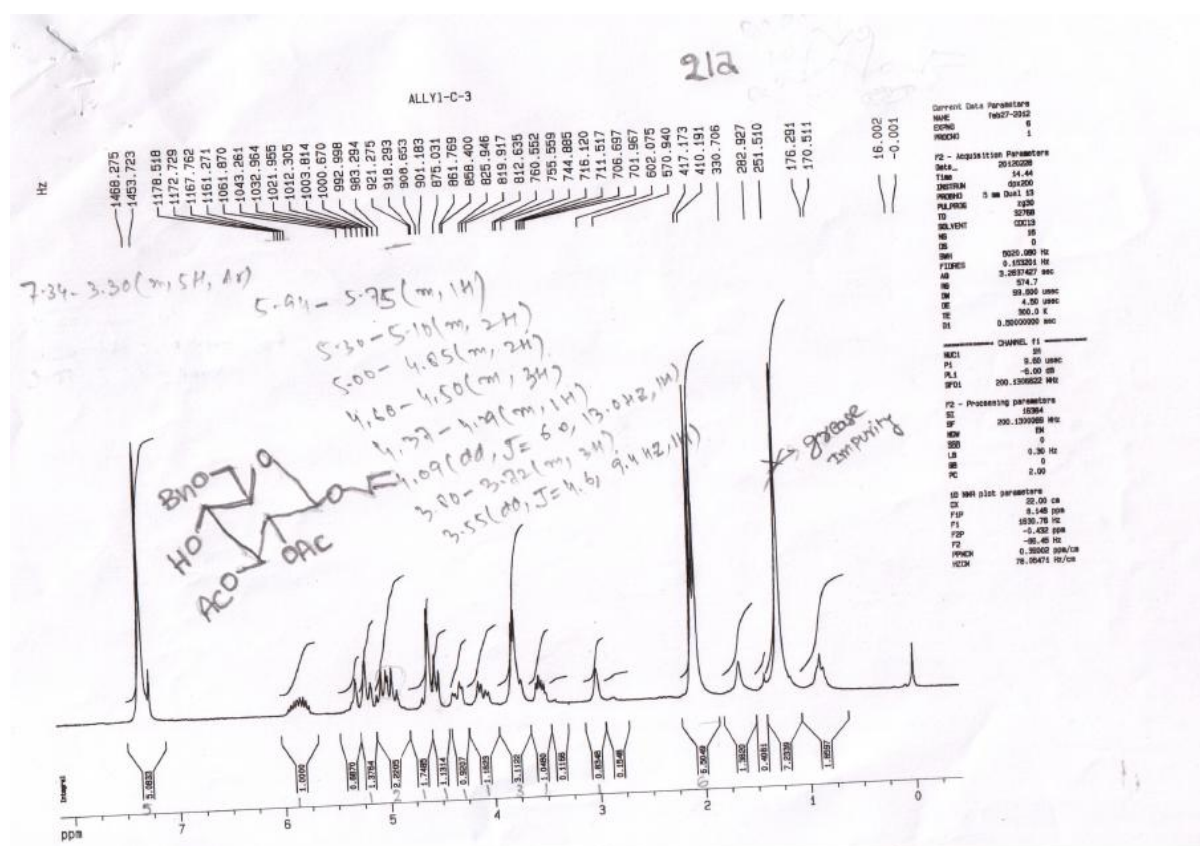

# <sup>13</sup>C NMR of compound 21a

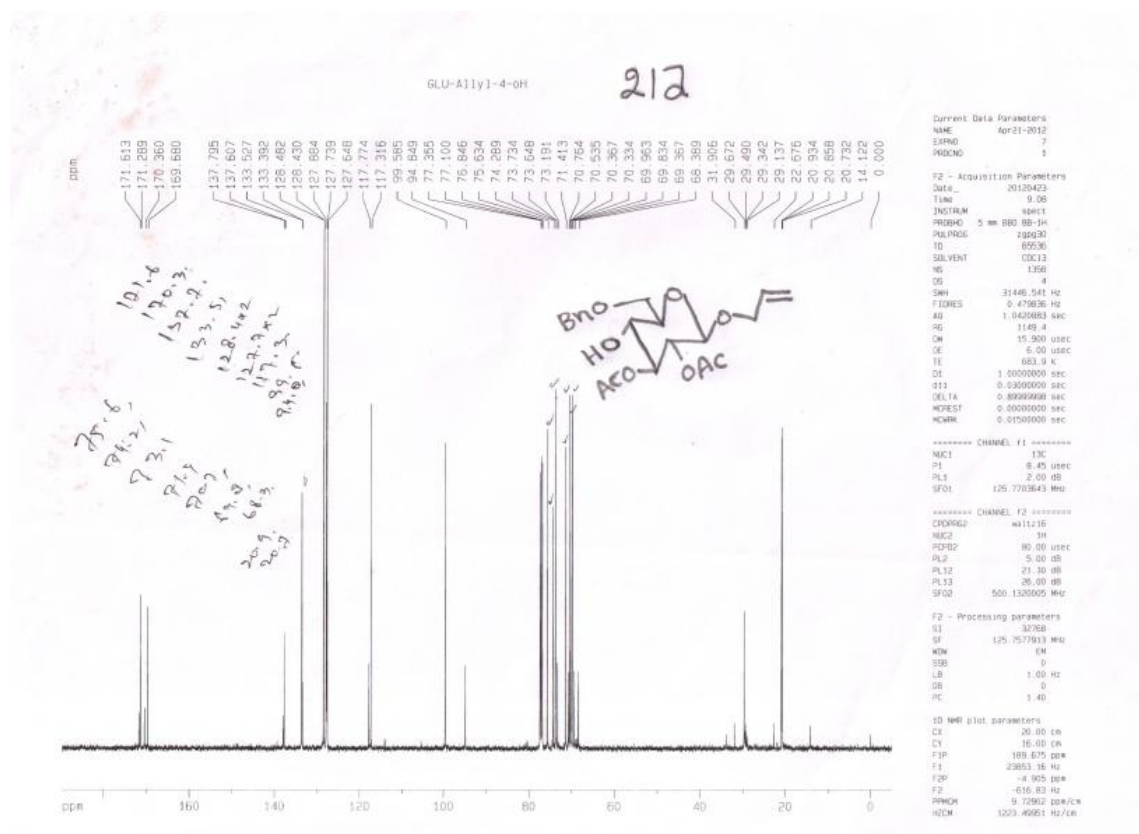





# <sup>1</sup>H NMR of compound 24a

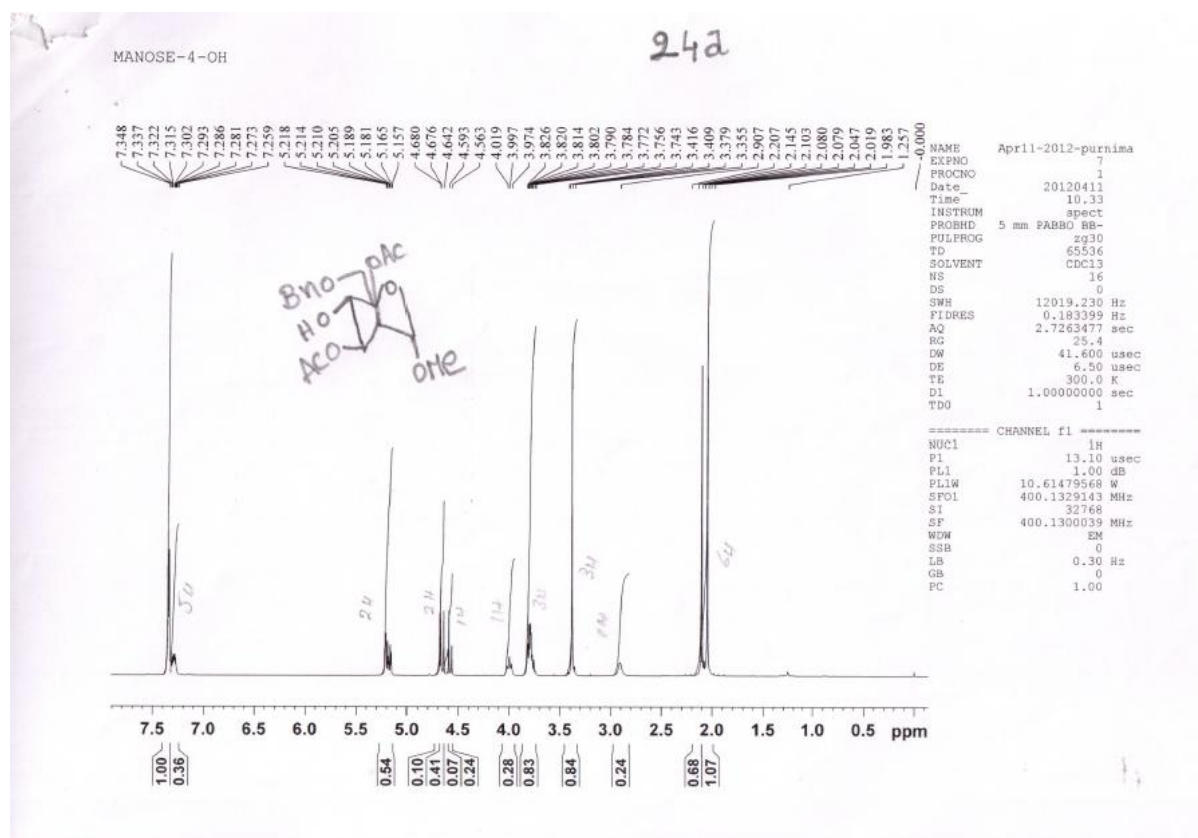

# <sup>13</sup>C NMR of compound 24a

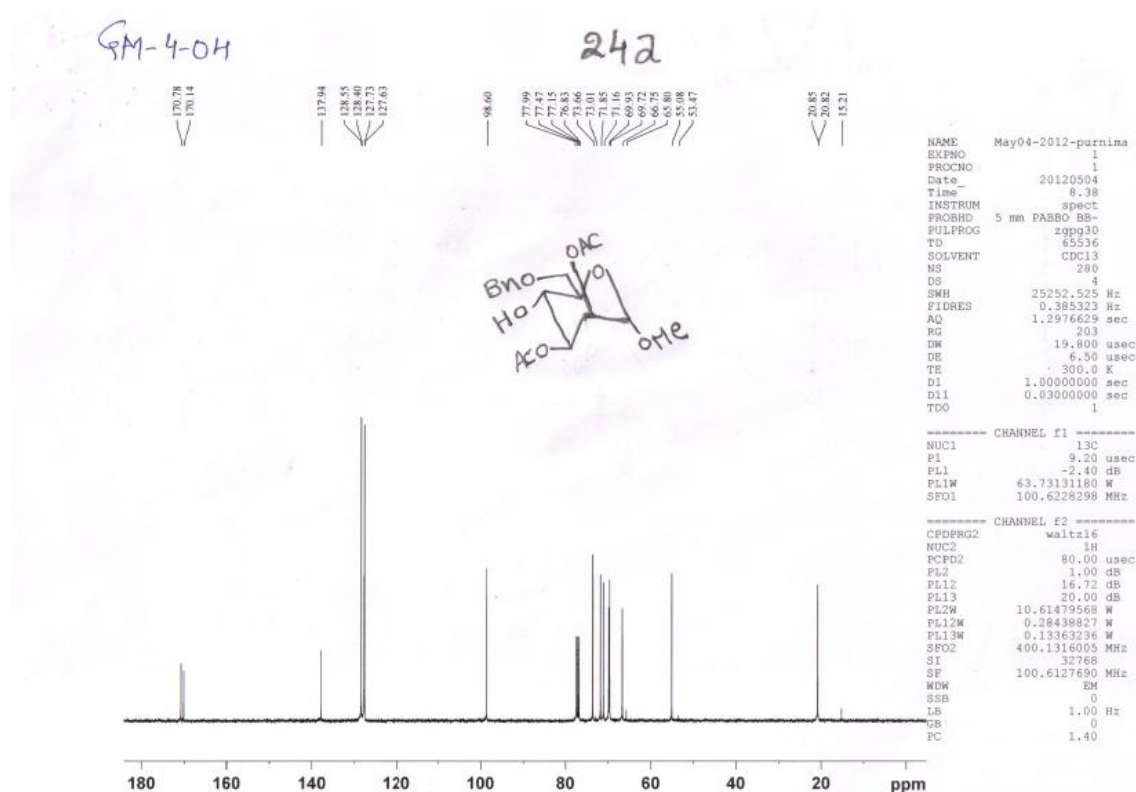

# <sup>1</sup>H NMR of compound 25a

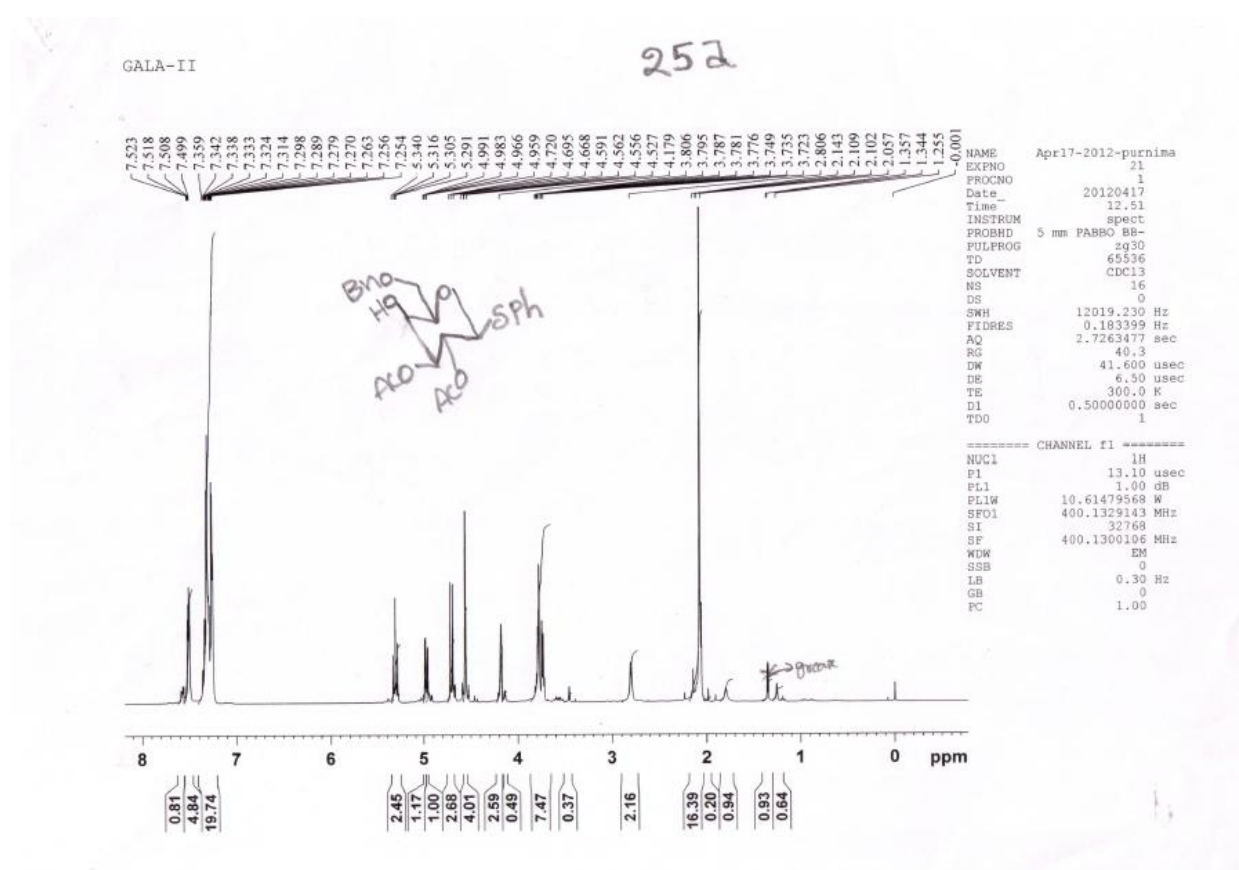

# <sup>13</sup>C NMR of compound 25a

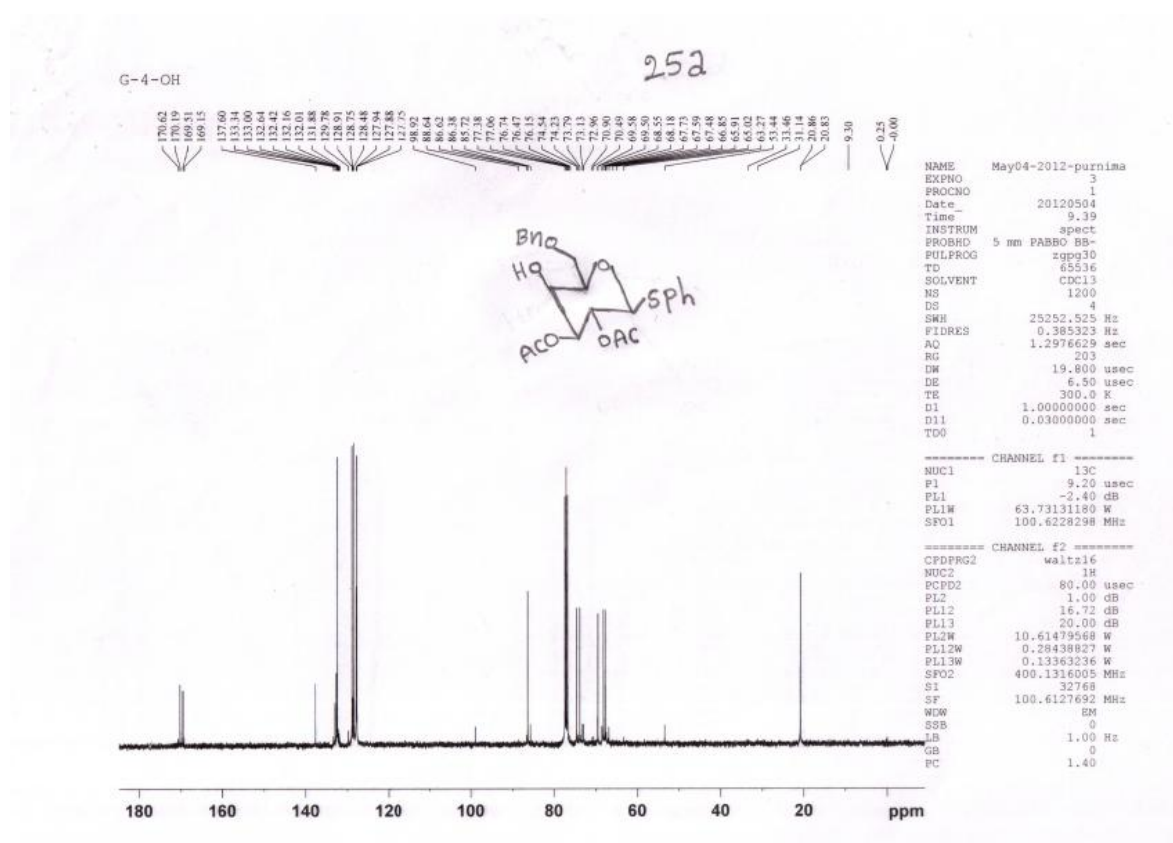

Supplement: c2ob25452b_2.pdf [file c2ob25452b_2.pdf]
